# Supplementary material for: Effects of Meal Timing on Postprandial Glucose Metabolism and Blood Metabolites in Healthy Adults
Source: MDPI journal article supplement (doi:10.3390/nu10111763), 2018-11-14
Supplement: s1 [file s1]

Figure S1

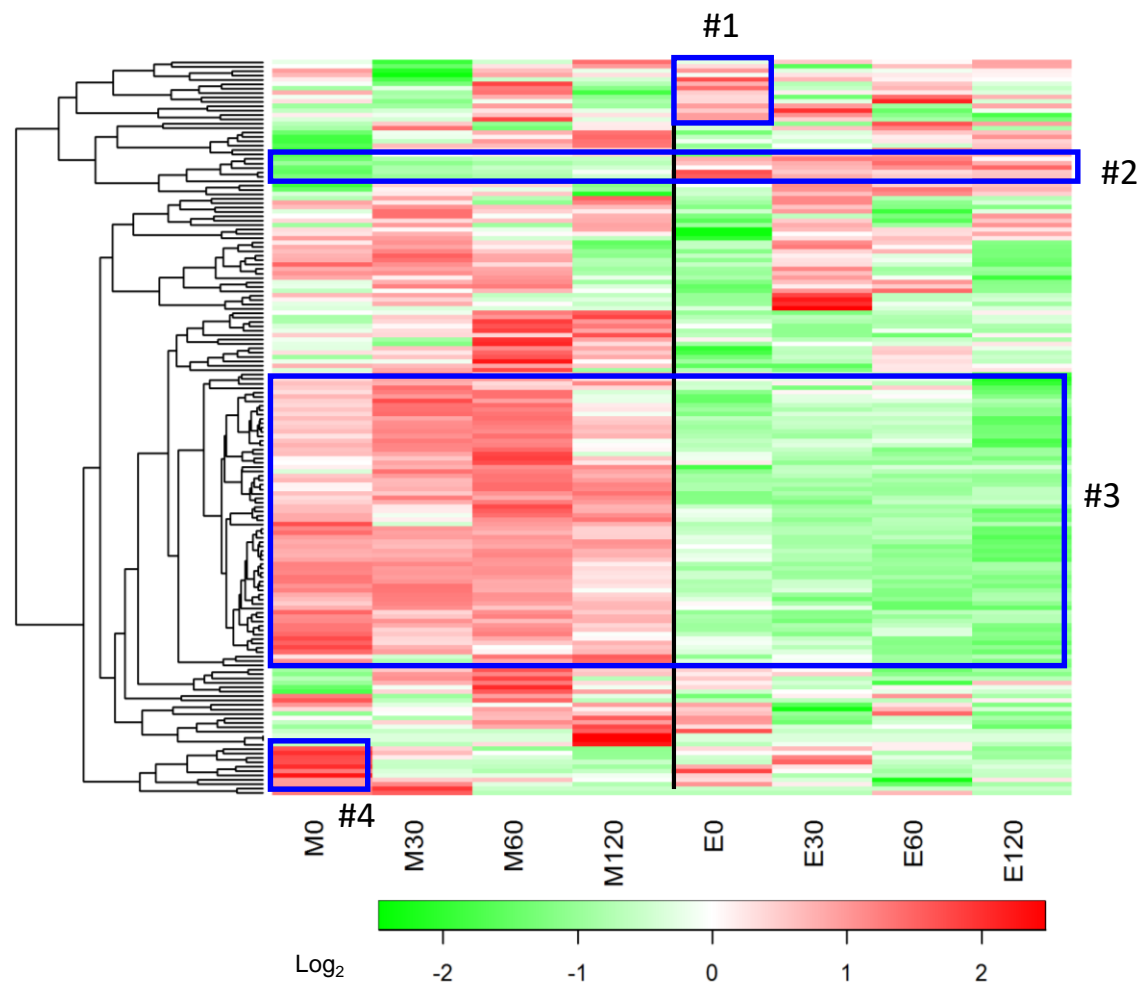

Figure S1 – Characteristics of heatmap of total metabolic profiles during fasting state and postprandial state.

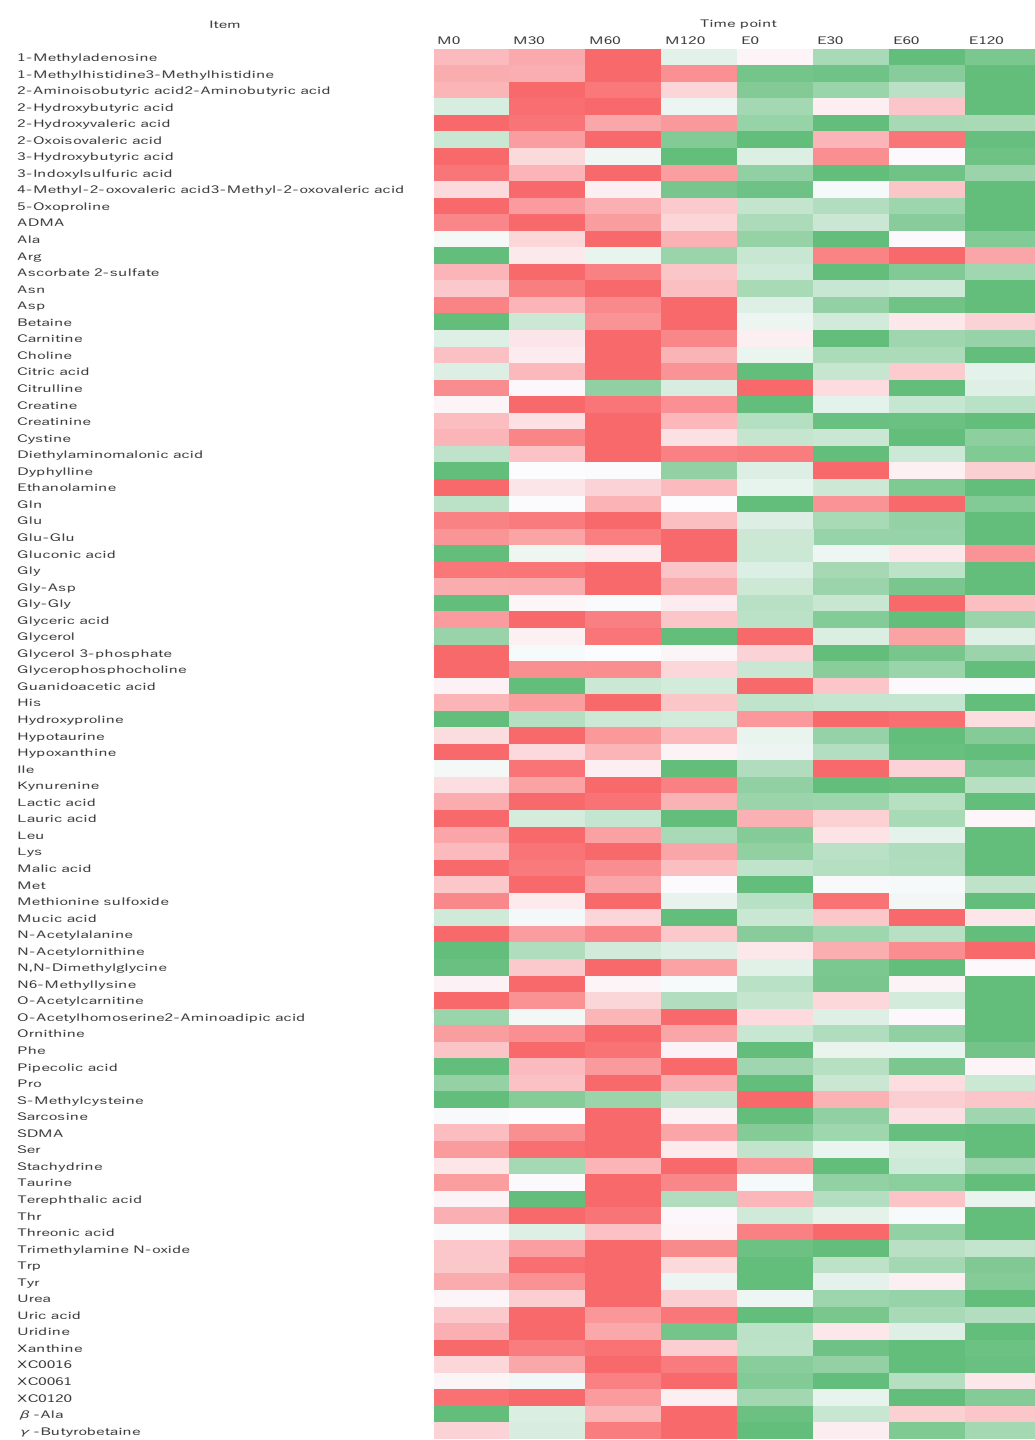

Figure S2 – Heatmap of extraction of detectable compounds at all time points (84/167\*).

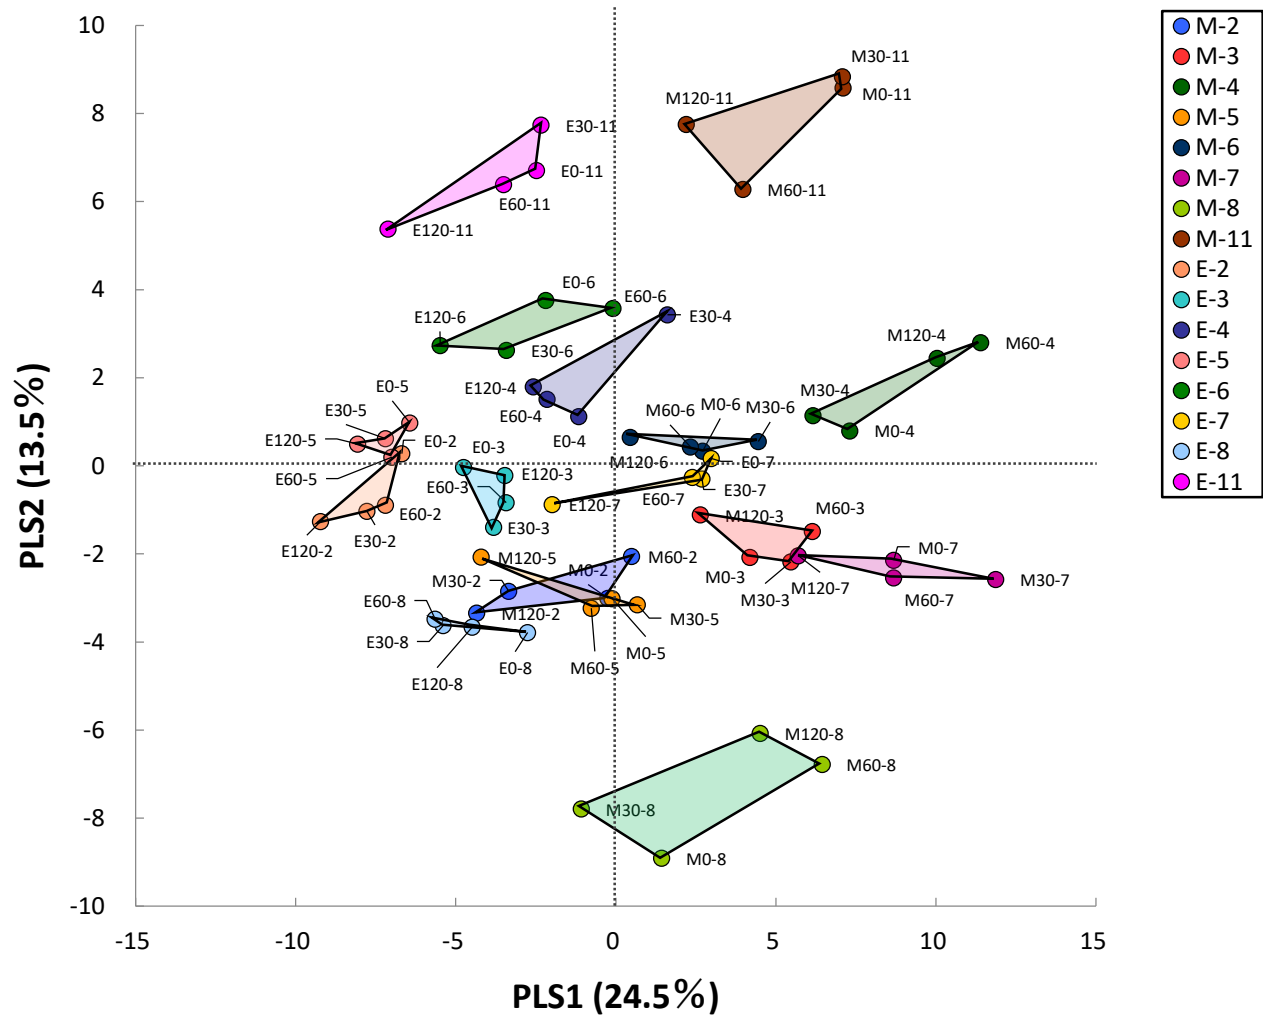

Figure S3 – Partial least squares analysis of individual metabolic changes from fasting to postprandial state.
