# Supplementary material for: Effects of Meal Timing on Postprandial Glucose Metabolism and Blood Metabolites in Healthy Adults
Source: MDPI journal article supplement (doi:10.3390/nu10111763), 2018-11-14
Supplement: s1 [file s1]

|                                 | Morning trial<br>(n = 8) | Evening trial<br>(n = 8) |
|---------------------------------|--------------------------|--------------------------|
| Age (years)                     | 23.4 ± 0.8               | 23.4 ± 0.8               |
| Height (m)                      | 1.7 ± 0.02               | 1.7 ± 0.02               |
| Body mass (kg)                  | 65.5 ± 4.3               | 66.0 ± 4.3               |
| BMI                             | 21.7 ± 1.1               | 21.9 ± 1.1               |
| Systolic blood pressure (mmHg)  | 119.1 ± 2.9              | 119.1 ± 2.9              |
| Diastolic blood pressure (mmHg) | 70.3 ± 3.1               | 70.3 ± 3.1               |

Table S1. Physical characteristics of the participants who evaluated serum metabolites (n=8).

All data are presented as means ± SE.

| Metabolites                    |
|--------------------------------|
| Serotonin                      |
| Isobutyrylcarnitine            |
| Urocanic acid                  |
| <i>cis</i> -4-Hydroxyproline   |
| Guanidoacetic acid             |
| Terephthalic acid              |
| Glycerol                       |
| <i>p</i> -Hydroxybenzoic acid  |
| XC0029                         |
| Indole-3-acetic acid           |
| Isovaleric acid                |
| Valeric acid                   |
| Cysteine glutathione disulfide |
| Threonic acid                  |
| Pelargonic acid                |
| Theobromine                    |
| Homocitrulline                 |
| β-Ala                          |
| Gluconic acid                  |
| Betaine                        |

|                                         |
|-----------------------------------------|
| Gluconolactone                          |
| Gly-Gly                                 |
| Alliin                                  |
| Hydroxyproline                          |
| Cystathionine                           |
| <i>N</i> -Acetylornithine               |
| Trigonelline                            |
| <i>S</i> -Methylcysteine                |
| Cyclohexylamine                         |
| Dyphylline                              |
| Arg                                     |
| Mucic acid                              |
| Taurocholic acid                        |
| Perillic acid                           |
| <i>N</i> -Acetylputrescine              |
| His-Glu                                 |
| <i>N</i> <sup>8</sup> -Acetylspermidine |
| 7-Methylguanine                         |
| Caffeine                                |
| XC0132                                  |
| <i>N</i> <sup>6</sup> -Acetyllysine     |
| 2-Hydroxy-4-methylvaleric acid          |
| Ile                                     |
| Hexanoic acid                           |
| 4-Methyl-2-oxovaleric acid              |
| 3-Methyl-2-oxovaleric acid              |
| Uridine                                 |
| Leu                                     |
| <i>O</i> -Acetylcarnitine               |
| Triethanolamine                         |
| <i>N</i> -Acetylglycine                 |
| Methionine sulfoxide                    |
| 2-Oxoisovaleric acid                    |
| 2-Hydroxybutyric acid                   |
| Gln                                     |

|                                              |
|----------------------------------------------|
| Glycocholic acid                             |
| Decanoic acid                                |
| Octanoic acid                                |
| Ascorbate 2-glucoside                        |
| XC0061                                       |
| Pipecolic acid                               |
| <i>N,N</i> -Dimethylglycine                  |
| Carnitine                                    |
| Ala                                          |
| 5-Methoxyindoleacetic acid                   |
| <i>N</i> <sup>5</sup> -Ethylglutamine        |
| Diethanolamine                               |
| Citric acid                                  |
| <i>cis</i> -Aconitic acid                    |
| Pro                                          |
| Sarcosine                                    |
| Isovalerylcarnitine                          |
| <i>N</i> <sup>2</sup> -Phenylacetylglutamine |
| XC0065                                       |
| Nicotinamide                                 |
| Butyrylcarnitine                             |
| <i>N</i> <sup>6</sup> -Methyllysine          |
| Val                                          |
| Tyr                                          |
| Met                                          |
| Trp                                          |
| 2-Aminoisobutyric acid                       |
| 2-Aminobutyric acid                          |
| Phe                                          |
| His                                          |
| Asn                                          |
| Lys                                          |
| Lactic acid                                  |
| Aminoacetone                                 |
| Thr                                          |

|                                |
|--------------------------------|
| Ser                            |
| Cystine                        |
| 1-Methyladenosine              |
| Urea                           |
| <i>N</i> -Acetylgalactosamine  |
| <i>N</i> -Acetylmannosamine    |
| <i>N</i> -Acetylglucosamine    |
| Isocitric acid                 |
| Creatine                       |
| SDMA                           |
| 1-Methylhistidine              |
| 3-Methylhistidine              |
| XC0016                         |
| Kynurenine                     |
| Homovanillic acid              |
| Uric acid                      |
| Trimethylamine <i>N</i> -oxide |
| Creatinine                     |
| Choline                        |
| Taurine                        |
| Imidazolelactic acid           |
| Succinic acid                  |
| Malic acid                     |
| 5-Oxoproline                   |
| Gly                            |
| Glu-Glu                        |
| Asp                            |
| Ornithine                      |
| Gly-Asp                        |
| Glu                            |
| Paraxanthine                   |
| 1-Methylnicotinamide           |
| Xanthine                       |
| Glycerophosphocholine          |
| Hippuric acid                  |

|                               |
|-------------------------------|
| ADMA                          |
| XC0120                        |
| Glyceric acid                 |
| Ascorbate 2-sulfate           |
| Hypotaurine                   |
| Quinic acid                   |
| Pyruvic acid                  |
| 3-Indoxylsulfuric acid        |
| 2-Hydroxyvaleric acid         |
| <i>N</i> -Acetylalanine       |
| 2-Oxoglutaric acid            |
| 2-Hydroxyisobutyric acid      |
| Hypoxanthine                  |
| Ethanolamine                  |
| Octanoylcarnitine             |
| Guanidinosuccinic acid        |
| $\gamma$ -Butyrobetaine       |
| Isethionic acid               |
| Glucuronic acid               |
| Galacturonic acid             |
| <i>N</i> -Methylproline       |
| Argininosuccinic acid         |
| Ergothioneine                 |
| 3-Aminopropionitrile          |
| Acetohydroxamic acid          |
| 5-Hydroxylysine               |
| Thr-Asp                       |
| Glutathione (GSSG)_divalent   |
| Piperidine                    |
| 3-Methoxytyrosine             |
| <i>N</i> -Methylnorsalsolinol |
| Stachydrine                   |
| Diethylaminomalonic acid      |
| <i>O</i> -Acetylhomoserine    |
| 2-Aminoadipic acid            |

|                                 |
|---------------------------------|
| Isopropanolamine                |
| <i>N</i> -Methylglutamic acid   |
| 2-Hydroxyglutaric acid          |
| 5-Methylcytosine                |
| Myristoleic acid                |
| 3-Phenylpropionic acid          |
| 3-Hydroxybutyric acid           |
| 10-Hydroxydecanoic acid         |
| Lauric acid                     |
| Citrulline                      |
| Glycerol 3-phosphate            |
| 1-Methyl-4-imidazoleacetic acid |
| 1-Methyl-2-pyrrolidone          |
| <i>N</i> -Acetylglucosylamine   |
| Fumaric acid                    |

Table S2 The list of all metabolites of Figure 3
